# Supplementary material
Source: PubMed Central journal article supplement (PMC2885179)
Supplement: supp_M110.113837_jbc.M110.113837-1.pdf [file supp_M110.113837_jbc.M110.113837-1.pdf]

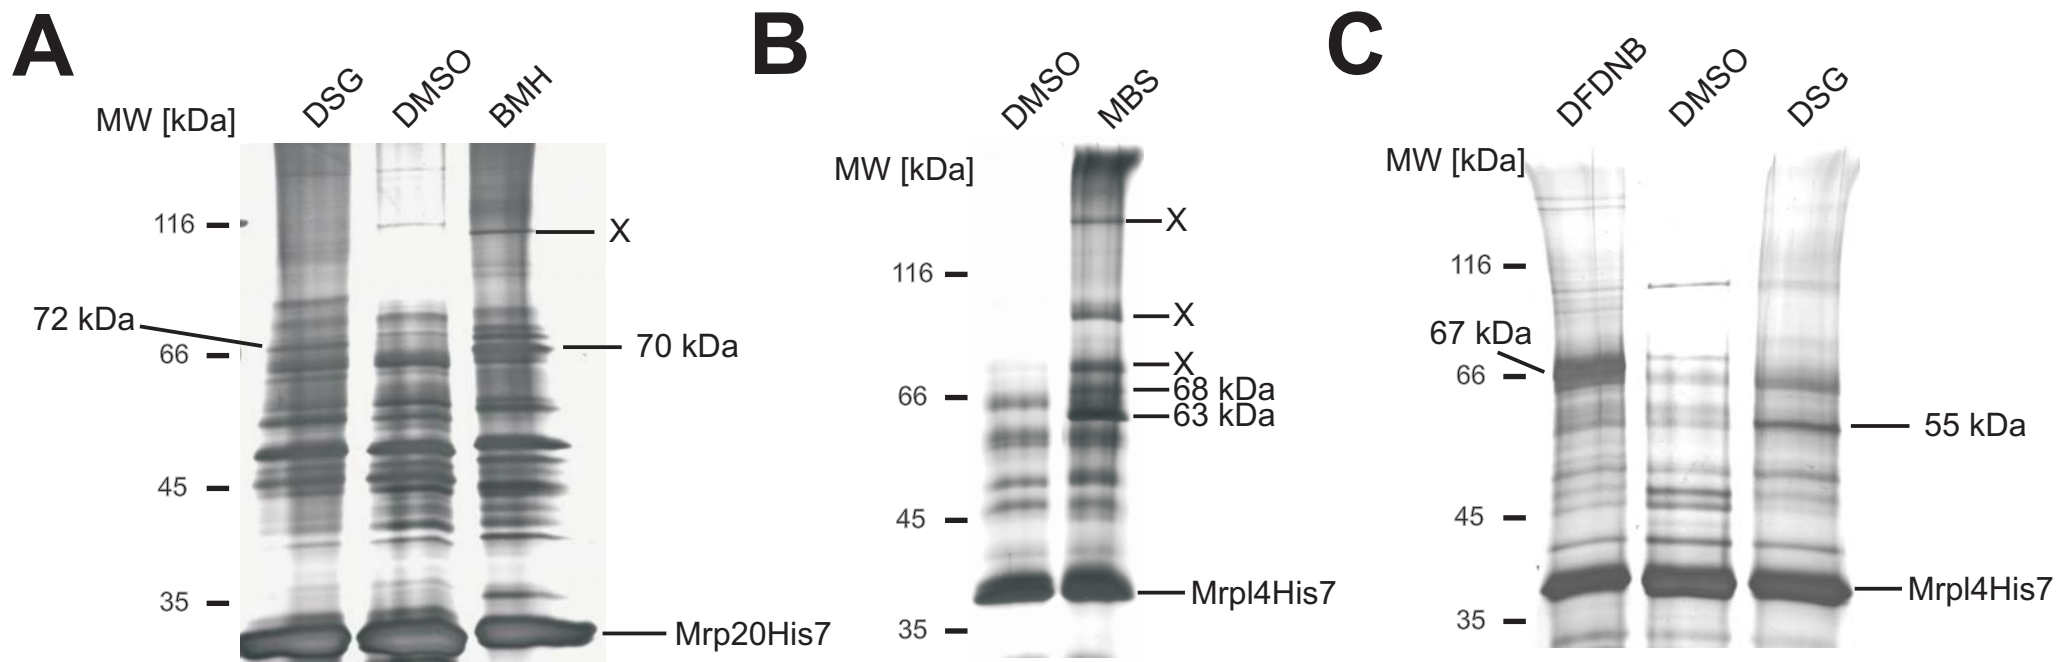

Supplementary figure1 Gruschke *et al.* Mitochondria containing His7-tagged versions of Mrp20 (A) or Mrpl4 (B and C) were used for large-scale crosslinking, purification and MS-analyses as in Figure 3A.

| <b>Bait</b>       | <b>app. MW Bait</b> | <b>Sequence coverage (# of different peptides) Bait</b> | <b>app. MW Crosslinking product</b> | <b>Crosslinking partner</b> | <b>app. MW Crosslinking partner</b> | <b>Sequence coverage (# of different peptides) Crosslinking partner</b> |
|-------------------|---------------------|---------------------------------------------------------|-------------------------------------|-----------------------------|-------------------------------------|-------------------------------------------------------------------------|
| <b>Mrpl40His7</b> | 38 kDa              | 41 % (11)                                               | 70 kDa                              | <b>Mrp20</b>                | 32 kDa                              | 32 % (11)                                                               |
|                   |                     | 44 % (14)                                               | 55 kDa                              | <b>Mrpl27</b>               | 17 kDa                              | 23 % (4)                                                                |
|                   |                     | 24 % (8)                                                | 72 kDa                              | <b>Mrpl13</b>               | 34 kDa                              | 17 % (4)                                                                |
| <b>Mrpl40His7</b> | 38 kDa              | 44 % (14)                                               | 100 kDa                             | <b>Mrp20 and</b>            | 32 kDa                              | 15 % (5)                                                                |
|                   |                     |                                                         |                                     | <b>Mrpl13</b>               | 34 kDa                              | 32 % (9)                                                                |
| <b>Mrp20His7</b>  | 33 kDa              | 43 % (13)                                               | 70 kDa                              | <b>Mrpl4</b>                | 36 kDa                              | 34 % (10)                                                               |
|                   |                     | 44 % (12)                                               | 72 kDa                              | <b>Mrpl3</b>                | 40 kDa                              | 50 % (18)                                                               |
| <b>Mrpl4His7</b>  | 37 kDa              | 42 % (13)                                               | 70 kDa                              | <b>Mrpl22</b>               | 32 kDa                              | 29 % (8)                                                                |
|                   |                     | 51 % (16)                                               | 67 kDa                              | <b>Mrpl13</b>               | 34 kDa                              | 66 % (17)                                                               |
|                   |                     | 35 % (12)                                               | 55 kDa                              | <b>Mrpl27</b>               | 17 kDa                              | 21 % (4)                                                                |
|                   |                     | 55 % (17)                                               | 63 kDa                              | <b>Mba1</b>                 | 28 kDa                              | 31 % (6)                                                                |
| <b>Mba1His7</b>   | 30 kDa              | 28 % (8)                                                | 63 kDa                              | <b>Mrpl4</b>                | 36 kDa                              | 57 % (17)                                                               |
|                   |                     | 22 % (6)                                                | 61 kDa                              | <b>Mrpl22</b>               | 32 kDa                              | 39 % (16)                                                               |

**Supplementary table 1:** Identified crosslinking partners of Mrpl4, Mrp20, Mrpl40 and Mba1. The apparent molecular weights of the proteins as well as of the crosslinking products were estimated. Sequence coverage and the number of different peptides are indicated for each protein.
